# Supplementary material for: NIR light-responsive short peptide/2D NbSe2 nanosheets composite hydrogel with controlled-release capacity
Source: Royal Society of Chemistry journal article supplement (doi:10.1039/c8tb03326a), 2019-01-01
Supplement: c8tb03326a1.pdf [file c8tb03326a1.pdf]

## Experimental supporting information

### NIR light-responsive short peptide/2D NbSe<sub>2</sub> nanosheets composite hydrogel with controlled-release capacity

Can Wu, ‡<sup>a</sup> Jing Liu, ‡<sup>a</sup> Bin Liu, <sup>a</sup> Suyun He, <sup>a</sup> Guoru, Dai, <sup>a</sup> Bo Xu <sup>b\*</sup>, Wenying Zhong <sup>ac\*</sup>

<sup>a</sup> *Department of Analytical Chemistry, China Pharmaceutical University, Nanjing 210009, People's Republic of China*

<sup>b</sup> *Department of Physics, China Pharmaceutical University, Nanjing 210009, People's Republic of China*

<sup>c</sup> *Key Laboratory of Biomedical Functional Materials, China Pharmaceutical University, Nanjing 210009, People's Republic of China*

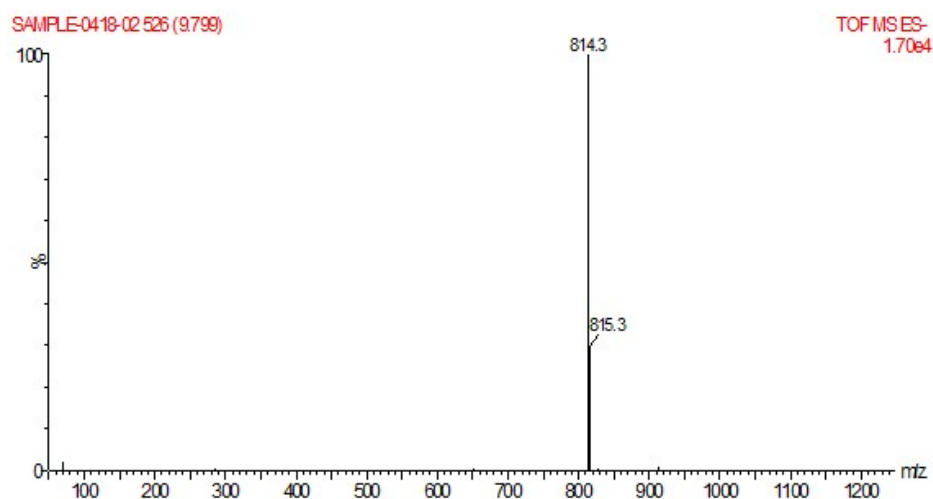

**Fig. S1** MS spectra of YD peptide (m/z 814.3 [M-H])

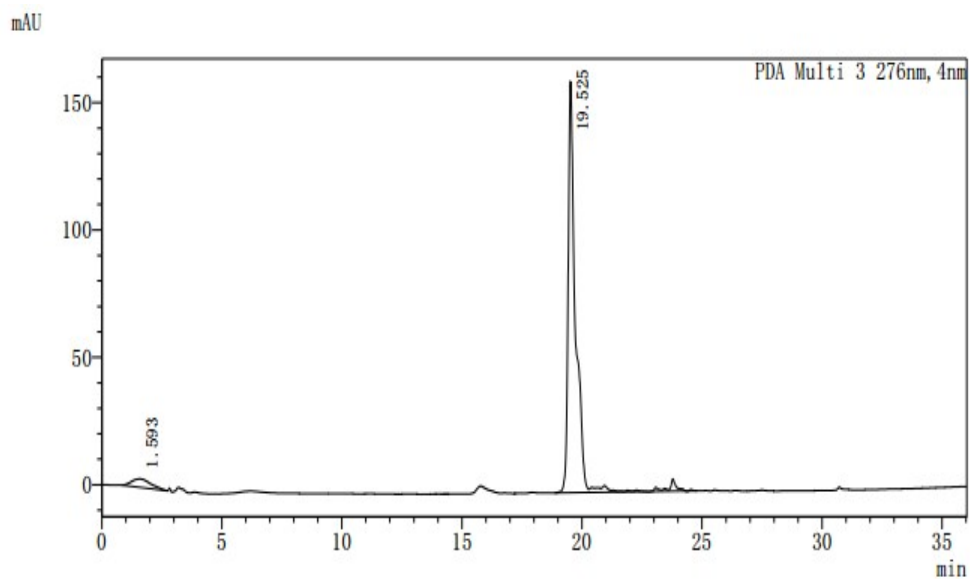

Reversed phase high performance liquid phase conditions:  
 Mobile phase: A phase: 0.1% TFA- water; B phase: 0.1% TFA- Methanol

Elution conditions:

| Time (min) | A (%) | B (%)  |
|------------|-------|--------|
| 0-25       | 55-0  | 45-100 |
| 25-27      | 0     | 100    |
| 27-35      | 0-55  | 100-45 |

**Fig. S2** The liquid chromatogram of YD peptide



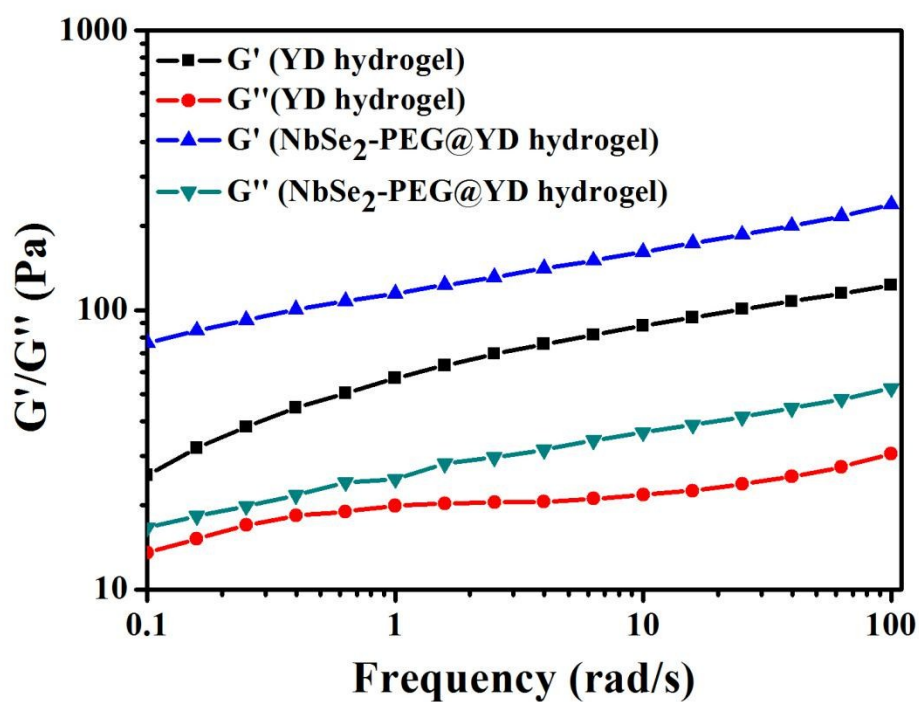

**Fig. S5** Dynamic Frequency Sweep Test of 2.0 wt% YD hydrogel and NbSe<sub>2</sub>-PEG@YD hydrogel (Strain: 0.2%; Frequency: 0.1~100 rad/s)

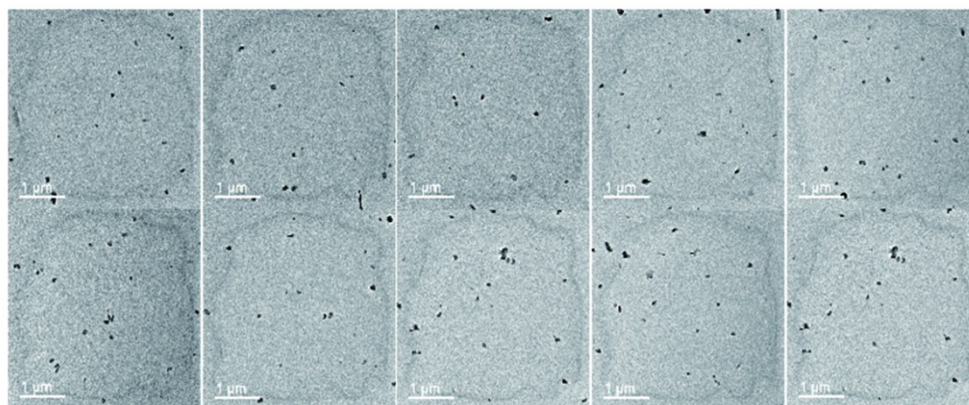

**Fig. S6** TEM images of NbSe<sub>2</sub>-PEG NSs

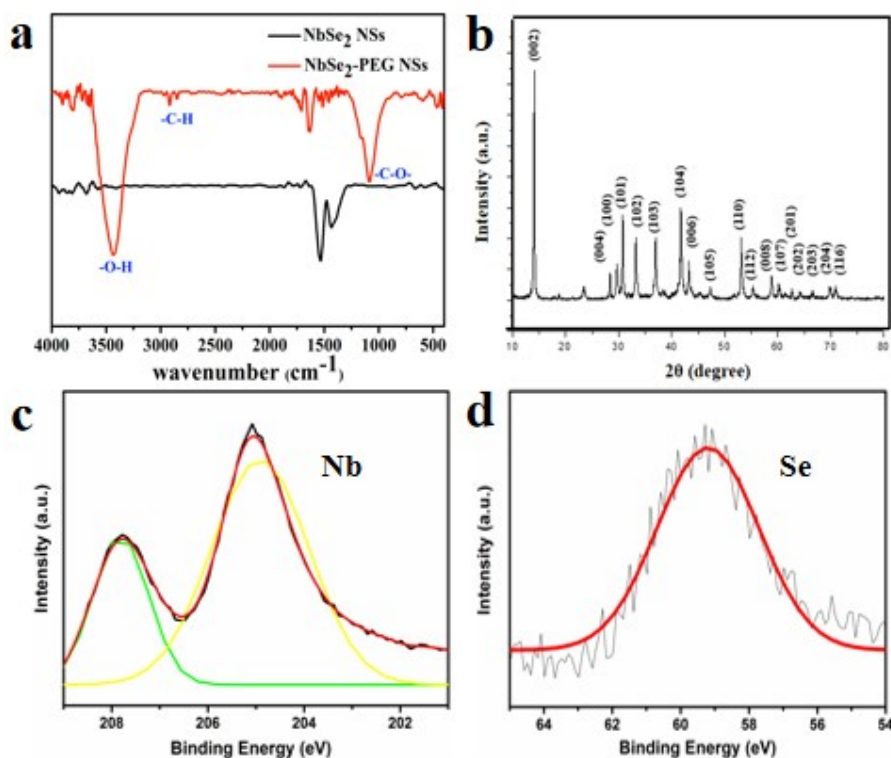

**Fig. S7** (a) FTIR spectra of NbSe<sub>2</sub> NSs and NbSe<sub>2</sub>-PEG NSs; (b) XRD spectra of NbSe<sub>2</sub>-PEG NSs; (c) (d) XPS spectra of NbSe<sub>2</sub>-PEG NSs

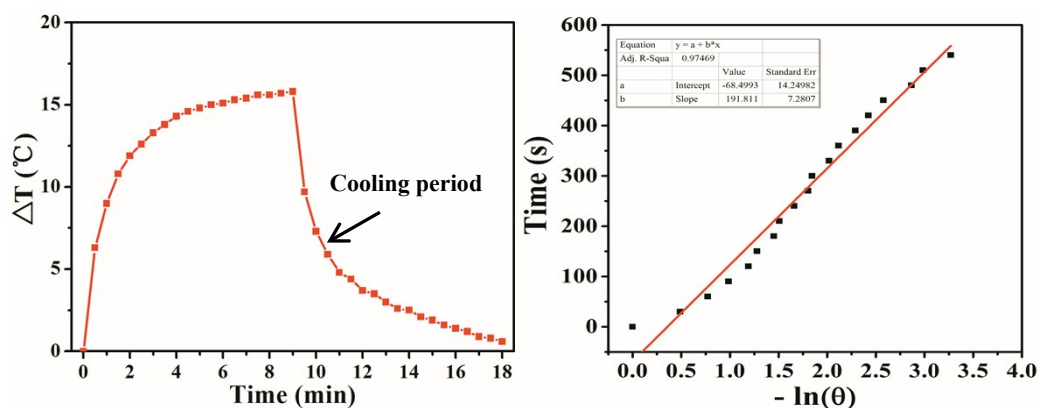

**Fig. S8** (a) Photothermal heating curve of the NbSe<sub>2</sub>-PEG NSs aqueous solution upon 808 nm laser irradiation (2 W/cm<sup>2</sup>) and then the laser was turned off; (b) Linear time data versus  $-\ln(\theta)$  obtained from the cooling period of (a).

To measure the photothermal conversion performance of the NbSe<sub>2</sub>-PEG NSs, 500  $\mu$ L of the NbSe<sub>2</sub>-PEG NSs aqueous solution was determined by the following equations:

$$\eta = \frac{hS(T_{\max} - T_{\max, \text{water}})}{I(1 - 10^{-A_{808}})}$$

$$hS = \sum mC_p / \tau_s$$

$$\tau_s = -t / \ln \theta$$

$$\theta = (T_{\text{amb}} - T) / (T_{\text{amb}} - T_{\max})$$

In the equations,  $h$  is the heat-transfer coefficient,  $S$  is the surface area of the

container,  $T$  is the real-time temperature,  $T_{\max}$  is the maximum system temperature, and  $T_{\text{amb}}$  is the ambient temperature of the surroundings,  $I$  is the laser power,  $A_{808}$  is the absorbance of the solution at 808 nm. The variable  $\tau_s$  is the sample-system time constant, and  $m$  and  $C$  are the mass and heat capacity of the deionized water used as the solvent.

$$A_{808} = 0.15442$$

$$\tau_s = 192 \text{ s}$$

$$hs = 0.5 \times 4.2 / 192 = 0.011$$

$$\eta = \{ [0.011 \times (15.8 - 2.65)] / 2 \times (1 - 10^{-0.15442}) \} \times 100\% = 24.1\%$$

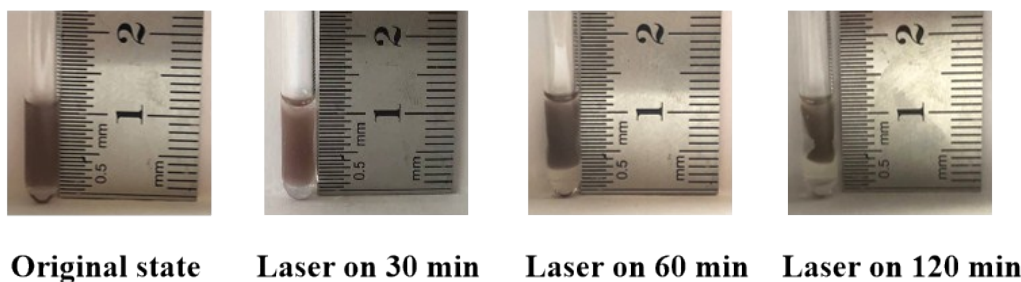

**Fig. S9** Optical images of NbSe<sub>2</sub>-PEG@YD hydrogel after 0 min, 30 min, 60 min and 120 min under NIR irradiation (808 nm, 2 W/cm<sup>2</sup>).

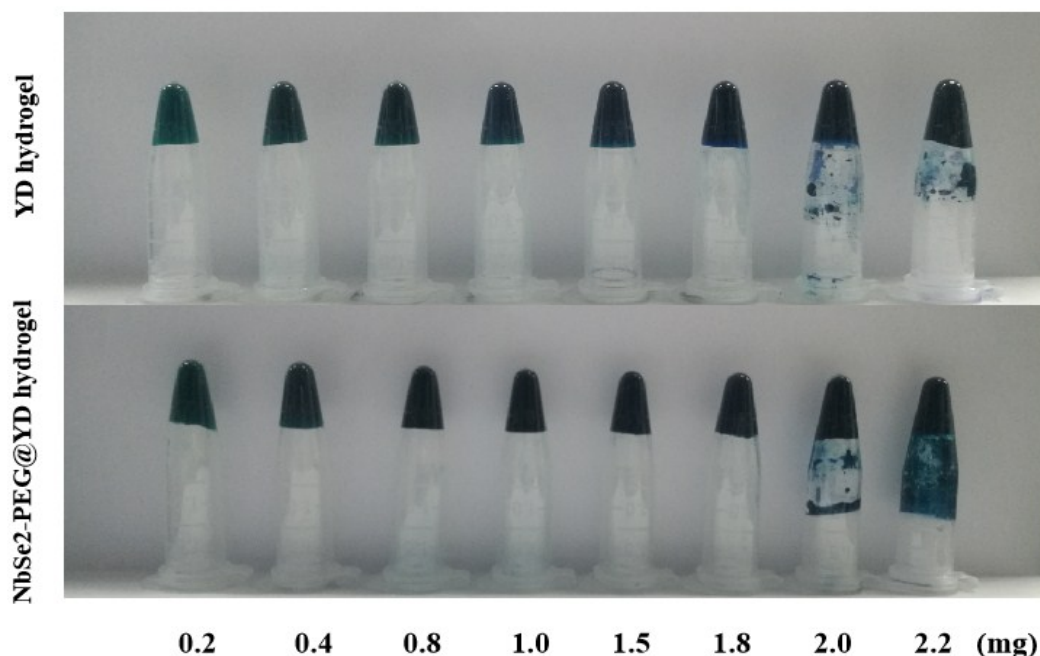

**Fig. S10** Images of inverted vials with hydrogels showing gelation and maximum loading capacity. Loading capacity is indicated as the amount of Malachite Green (mg) per 200  $\mu\text{L}$  of 2% (w/v) YD hydrogel and NbSe<sub>2</sub>-PEG@YD hydrogel.



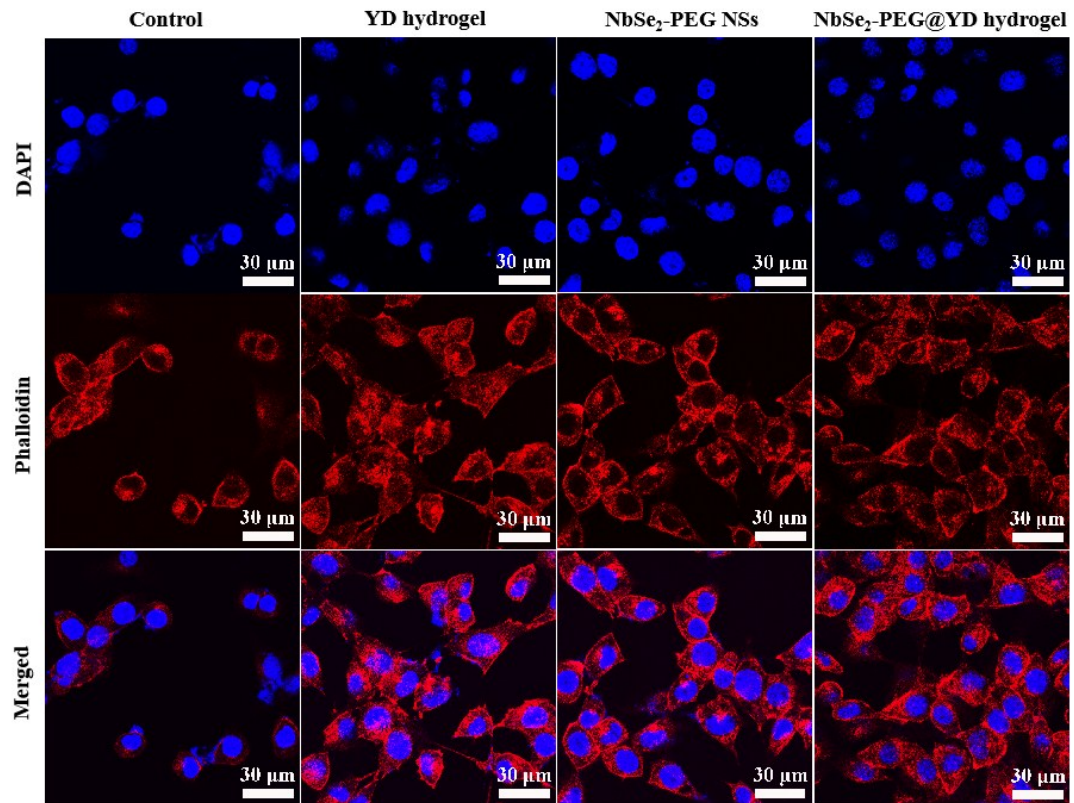

**Fig. S11** Confocal images of NIH 3T3 cells stained with DAPI and Alexa Fluor 633 phalloidin after treatment with YD hydrogel, NbSe<sub>2</sub>-PEG NSs, and NbSe<sub>2</sub>-PEG@YD hydrogel for 24 h. The fluorescence of DAPI and Alexa Fluor 633 phalloidin are colored as blue and red, respectively.
